# Supplementary material for: A Novel mRNA-Mediated and MicroRNA-Guided Approach to Specifically Eradicate Drug-Resistant Hepatocellular Carcinoma Cell Lines by Se-Methylselenocysteine
Source: MDPI journal article supplement (doi:10.3390/antiox10071094), 2021-07-07
Supplement: s1 [file s1]

## Supplementary figures S1

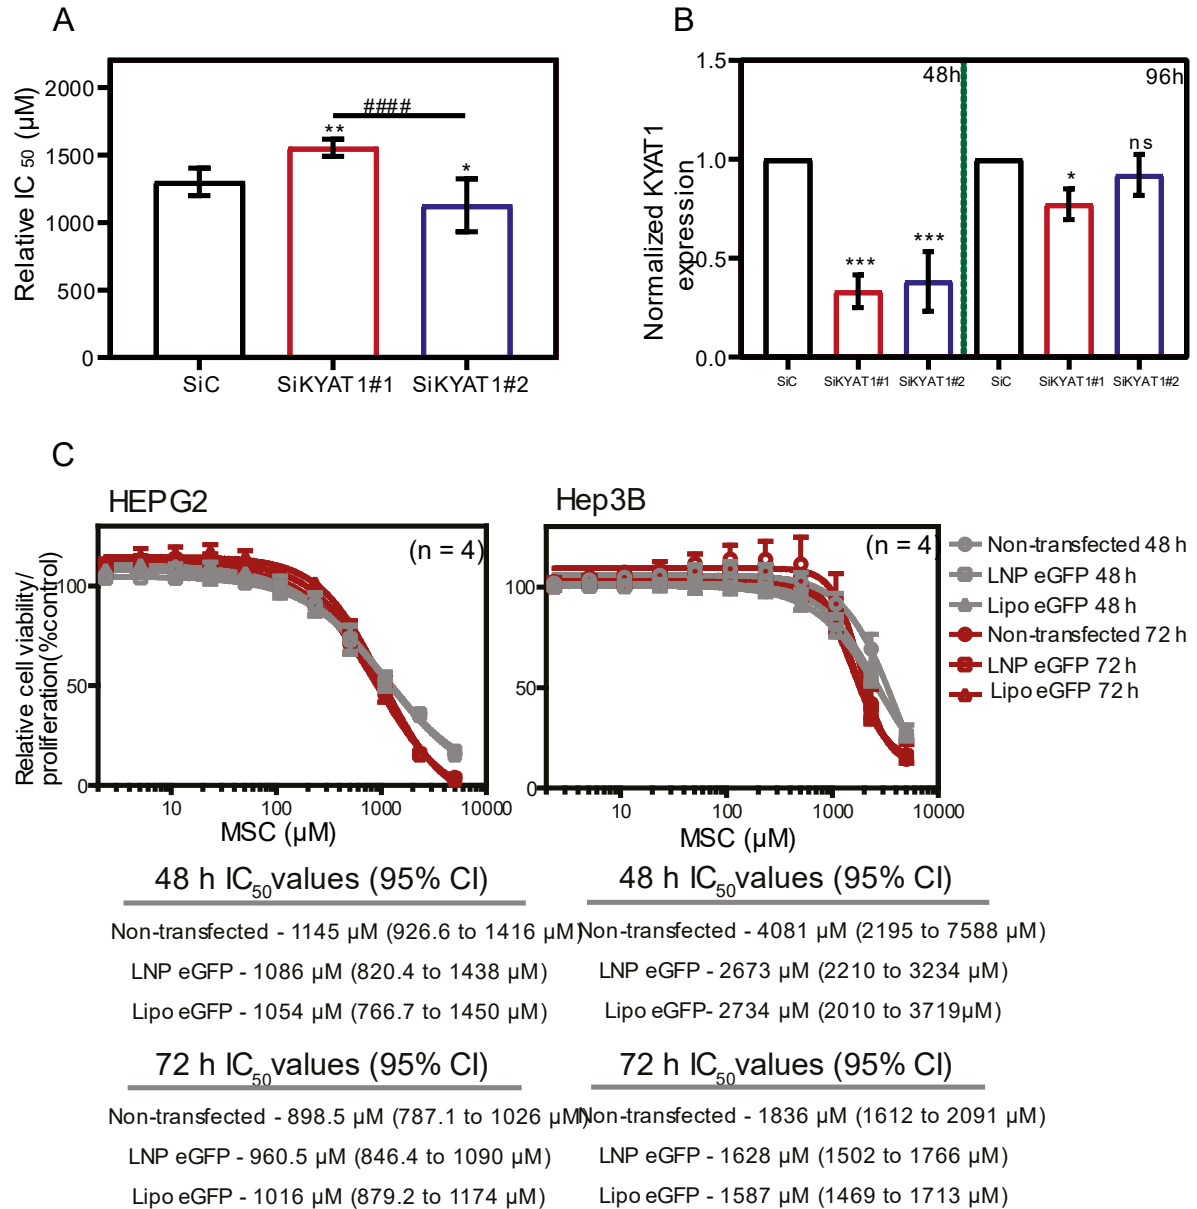

**Supplementary figure S1. KYAT1 knockdown protected the Huh7 cells from MSC induced cytotoxicity. (A)** KYAT1 siRNA mediated knockdown reverses the sensitivity of MSC mediated cytotoxicity at 72 h in Huh7 cells (n=8). The IC<sub>50</sub> values of KYAT1 knockdown Huh7 cells were 1302±102, 1554±65 & 1128±196 for control siRNA, KYAT1 siRNA#1 & KYAT1 siRNA#2 respectively. **(B)** Verification of knockdown efficiency of two KYAT1 siRNA (Ambion, Life Technologies, Carlsbad, CA, USA, #S2498, #S225044) at 48 h & 96 h by qRT-PCR. Negative control siRNA (Ambion, Life Technologies, Carlsbad, CA, USA, #AM4611) was used as control and KYAT1 gene expression was normalized with HPRT1 gene (n=3). Graph represent mean ± SD, statistical analysis performed with one-way ANOVA with 95% confidential interval followed by **(A)** Tukey's multiple comparison test **(B)** Dunnett's multiple comparison test (ns = not significant, \*  $p < 0.05$ , \*\*  $p < 0.01$ , \*\*\*  $p < 0.001$  and \*\*\*\*  $p < 0.0001$  compared with SiRNA control and \*  $p < 0.05$ , \*\*  $p < 0.01$ , \*\*\*  $p < 0.001$  & \*\*\*\*  $p < 0.0001$  compared between two KYAT1 SiRNA). **(C) Interference of LNP's with MSC cytotoxicity.** IC<sub>50</sub> values of 0.5 µg/mL of eGFPmRNA (Lipo or LNP) transfected cells upon

MSC treatment in HEPG2 and Hep3b cells at 48 h (n=4) and 72 h (n=4) with 95% confidential intervals. Lipo eGFP: transfected with lipofectamine 3000 (Invitrogen).

## Supplementary figures S2

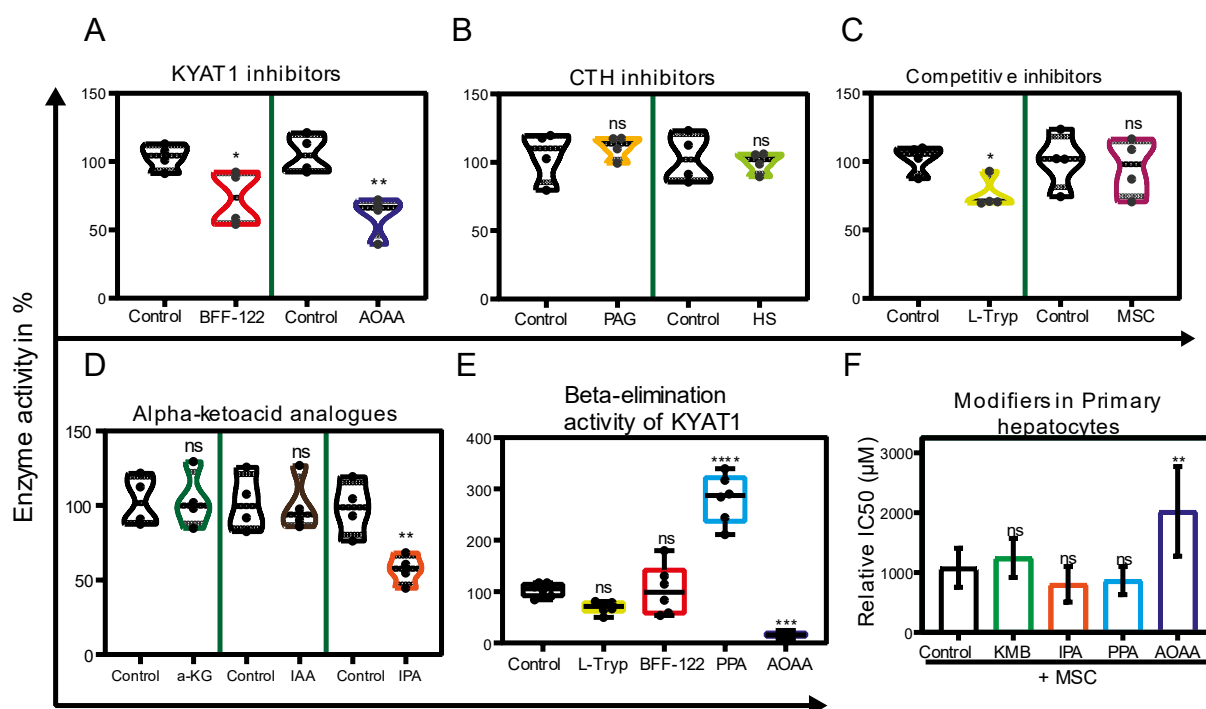

**Supplementary figure S2. KYAT 1 enzyme activity altered upon treatment with different pharmacological agents.** Transamination activity of KYAT1 was determined from cell lysates transfected with KYAT1mRNA encapsulated in LNP (0.5 μg/mL). **(A)** KYAT inhibitors (BFF-122, AOAA), (n=4). **(B)** Y-CTH inhibitors (PAG and HS), (n=4). **(C)** competitive inhibitors (L-Tryp and MSC) (n=4) and **(D)** α-Ketoacid analogues (α-KG, IAA and IPA) (n=4) relative to untreated control. **(E)** The same cell lysate was used to determine the beta-elimination activity of KYAT1 with different inhibitors and modifiers such as L-Tryp, BFF-122, PPA and AOAA, (n=6). **(F)** Cytotoxicity of MSC co-incubation with α-ketoacids/KYAT inhibitors (KMB, IPA, PPA and AOAA) in freshly isolated human hepatocytes at 72 h. IC<sub>50</sub> values for MSC, MSC+KMB, MSC+IPA, MSC+PPA and MSC+AOAA were 1079± 325, 1243± 326, 803± 298, 867± 235 and 2021± 748 respectively (n=7). **(A-F)** 20μg of protein were used in transamination and beta-elimination activity assay along with different inhibitors and inducers such as L-Tryp, L-Tryptophan (2.0 mM); HS, Homoserine (400 μM); PAG, Propargylglycine (1.0 mM); IAA, 3-Indoleacetic acid (1.0 mM); BFF-122 (50 μM); IPA, Indole pyruvic acid (200 μM); PPA, phenylpyruvic acid (400μM) AOAA, Aminoxyacetic acid (1.0 mM); α-KG, α-Ketoglutarate/dimethyl 2-oxoglutarate (2.0 mM); MSC, Se-methylselenocysteine (5.0 mM) and KMB, Keto-γ-(methylthio) butyric acid (100μM). Graph represent mean ± SD, statistical analysis performed with **(A-D)** Unpaired t-test **(E) & (F)** one-way ANOVA with 95% confidential interval followed by Tukey's multiple comparison test (ns = not significant, \*  $p < 0.05$ , \*\*  $p < 0.01$ , \*\*\*  $p < 0.001$  and \*\*\*\*  $p < 0.0001$  compared with untreated Control).

## Supplementary figures S3

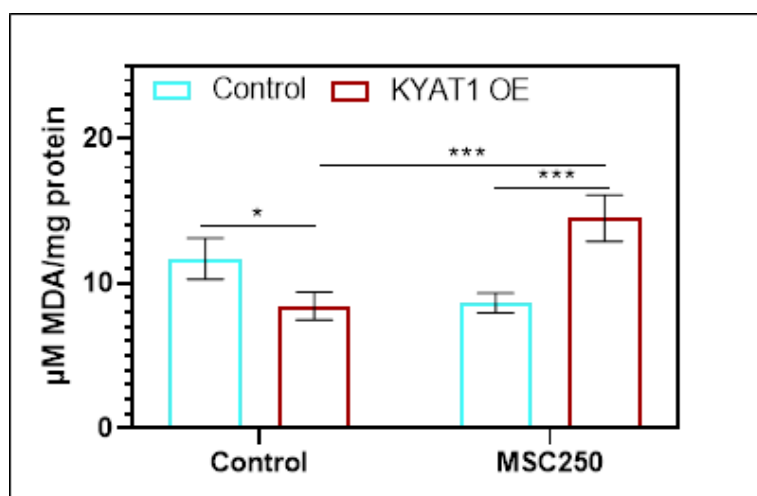

Supplementary figure S3. MSC induced Lipid ROS generation was measure at 48 h in HEPG2 cells induced with or without KYAT1 (0.5μg/mL), (n=3). Graph represent mean ± SD, statistical analysis was performed with 2way anova multiple comparisons test (ns = not significant, \*  $p < 0.05$ , \*\*  $p < 0.01$ , \*\*\*  $p < 0.001$  and \*\*\*\*  $p < 0.0001$ )

## Supplementary tables S1

**Table S1A.** Transamination activity of KYAT1 in HEPG2 cell lysate transfected with varying concentrations of eGFP and KYAT1mRNA encapsulated in LNP. Results are presented as mean ± SD from at least five independent experiments.

| Concentration in μg/mL | LNP eGFPmRNA                              | LNP KYAT1mRNA |
|------------------------|-------------------------------------------|---------------|
|                        | nmol of PPA-enol formed/min/mg of protein |               |
| 0.1                    | 0.35±0.29                                 | 9.1±1.4       |
| 0.25                   | 0.34±0.3                                  | 15.8±4.9      |
| 0.5                    | 0.53±0.42                                 | 18.6±3.8      |
| 1.0                    | 0.45±0.19                                 | 23±6.8        |

**Table S1B.** Transamination activity of KYAT1 in HEPG2 cell lysate measured at different time points in cells transfected with 0.5 μg/mL of eGFP and KYAT1mRNA encapsulated in LNP. Results are presented as mean ± SD from at least four independent experiments.

| Time in hr | 0.5μg/ml of LNP eGFPmRNA                  | 0.5μg/ml of LNP KYAT1mRNA |
|------------|-------------------------------------------|---------------------------|
|            | nmol of PPA-enol formed/min/mg of protein |                           |
| 24         | 0.52±0.33                                 | 15.1±2.9                  |
| 48         | 0.7±0.51                                  | 18.8±5.5                  |
| 72         | 0.61±0.38                                 | 16.8±4.0                  |
| 96         | 0.73±0.22                                 | 16.1±4.4                  |
| 120        | 0.59±0.31                                 | 11.1±2.6                  |

## Supplementary tables S2

**Table S2.** Relative IC<sub>50</sub> values for MSC alone or in combination with modifiers at 72 h in HEPG2, Hep3B and Huh7 cells transfected with 0.5 µg/mL of eGFPmRNA and KYAT1mRNA encapsulated in LNP. Results are presented as mean ± SD from triplicate measurements from at least six independent experiments. Resultant IC<sub>50</sub> values are denoted in µM.

| Treatments | HEPG2    |         | Hep3B    |         | Huh7     |         |
|------------|----------|---------|----------|---------|----------|---------|
|            | eGFP     | KYAT1   | eGFP     | KYAT1   | eGFP     | KYAT1   |
| MSC        | 1150±170 | 472±158 | 1517±138 | 810±58  | 1223±104 | 665±219 |
| MSC+KMB    | 920±282  | 346±162 | 1190±139 | 797±126 | 1010±154 | 407±213 |
| MSC+IPA    | 951±212  | 414±153 | 445±48   | 286±66  | 500±129  | 107±40  |
| MSC+PPA    | 1051±169 | 165±67  | 1225±192 | 269±87  | 588±123  | 107±41  |
